# Supplementary material for: Linear and star-shaped benzimidazolyl derivatives: syntheses, photophysical properties and use as highly efficient electron transport materials in OLEDs
Source: Royal Society of Chemistry journal article supplement (doi:10.1039/b918203a), 2009-11-16

## Supporting Information

# Linear and Star-shaped Benzimidazolyl Derivatives: Syntheses, Photophysical Properties and Use as Highly Efficient Electron Transport Materials in OLEDs

Wade White,<sup>†</sup> Zachary M. Hudson,<sup>†</sup> Xiaodong Feng,<sup>‡</sup> Sijin Han,<sup>‡</sup> Zheng-Hong Lu,<sup>‡</sup>  
Suning Wang\*<sup>†</sup>

<sup>†</sup>Department of Chemistry, Queen's University, Kingston, Ontario, K7L 3N6, Canada

<sup>‡</sup>Department of Materials Science and Engineering, University of Toronto, Toronto,  
Ontario, M5S 3E4, Canada

**S1.** Thermogravimetric analyses for compounds **1-5**.

**S2.** DSC diagrams of **3** and **4**.

**S3.** Cyclic voltammetry diagrams for compounds **1-5**.

**S4.** Solid state emission spectra of compounds **1 – 5**.

**S5.** Stern-Volmer plots for the fluorescent titrations of **1** and **5** with Ag(I) and Zn(II).

**S6.** Crystal structural data for compounds **2** and **5**.

### S1. Thermogravimetric analyses for compounds 1-5

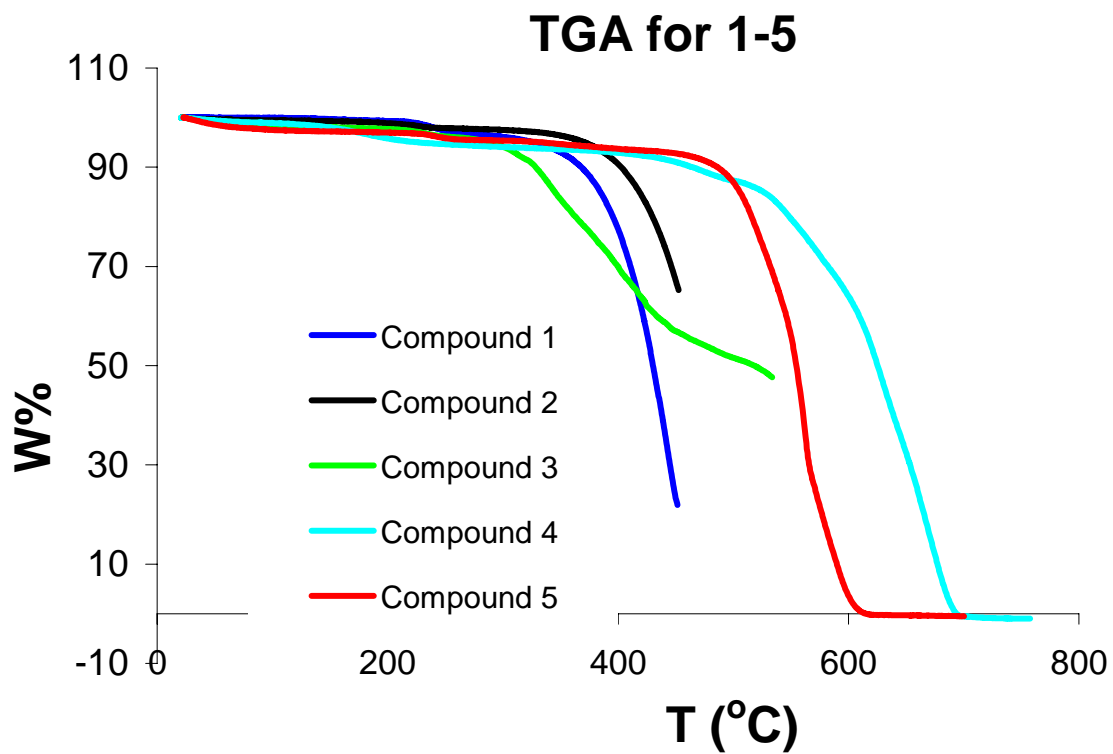

**S2. DSC diagrams of 3 and 4.**

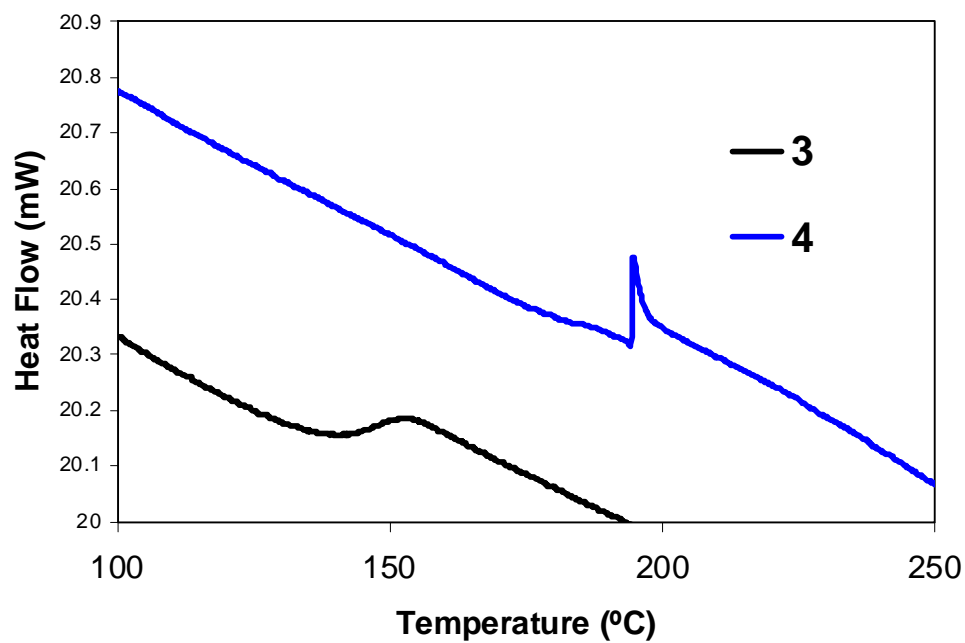

### S3. Cyclic voltammetry diagrams for compounds 1-5

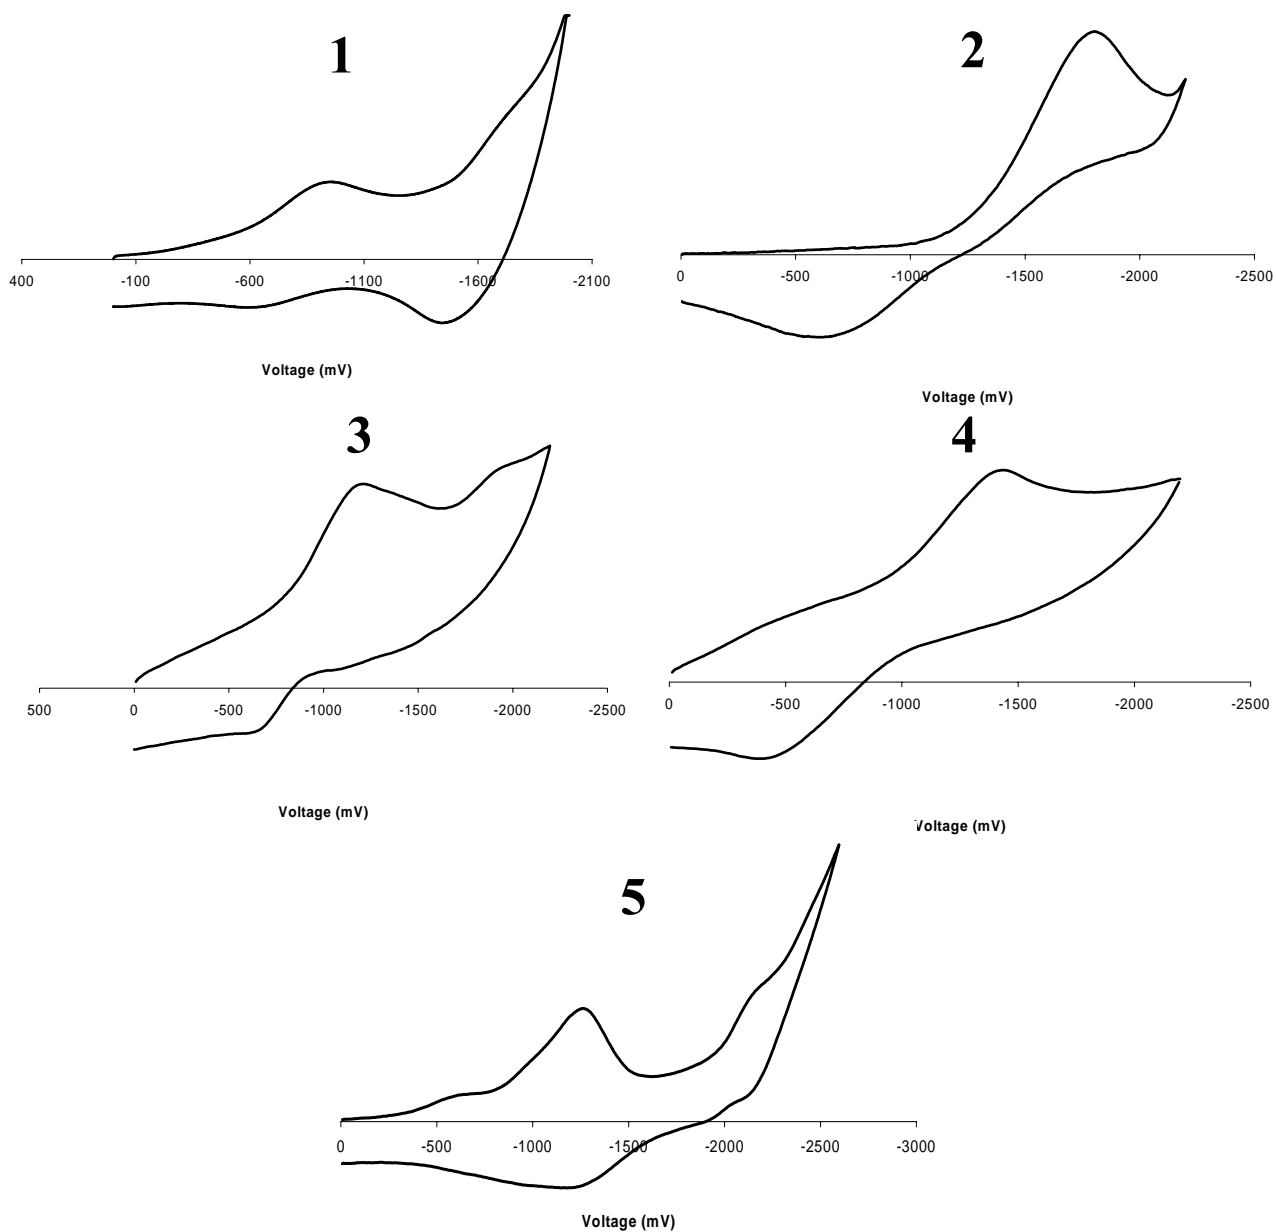

Cyclic voltammetry experiments for **1**, **2** and **4** were obtained in acetonitrile. Due to poor solubility, the corresponding diagrams for compounds **3** and **5** were performed in DMF.

**S4. Solid state emission spectra of compounds 1 – 5.**

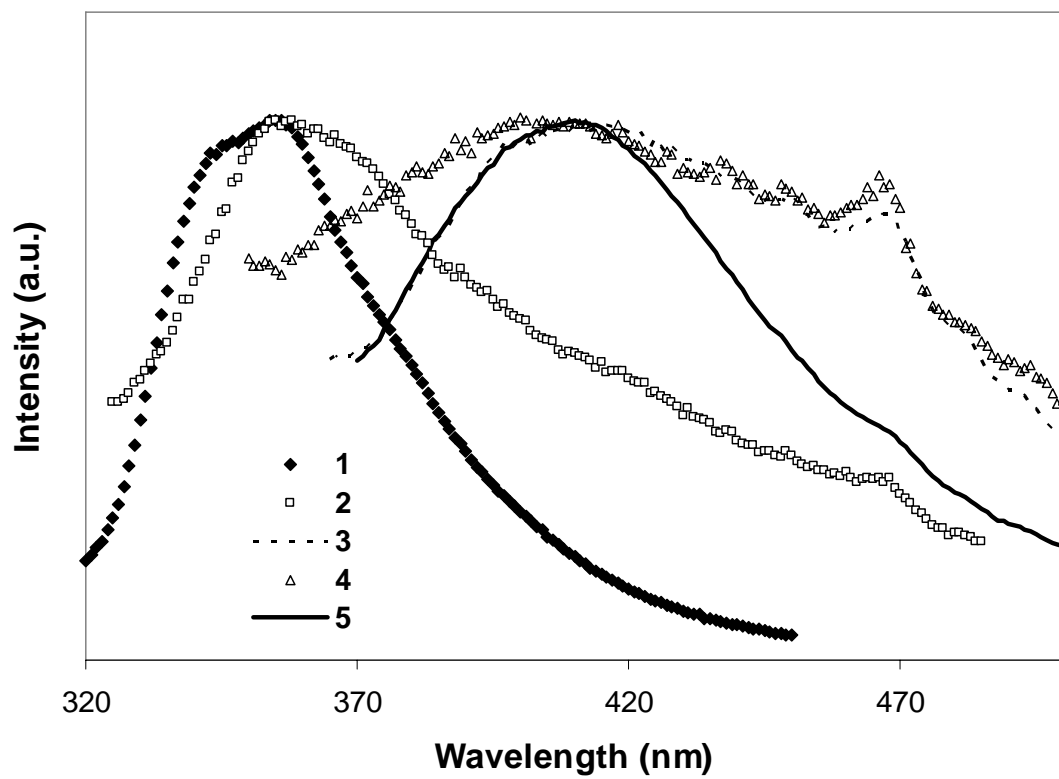

**S5.** Stern-Volmer plots for the fluorescent titrations of **1** and **5** with  $\text{AgNO}_3$  and  $\text{Zn}(\text{O}_2\text{CCF}_3)$ .

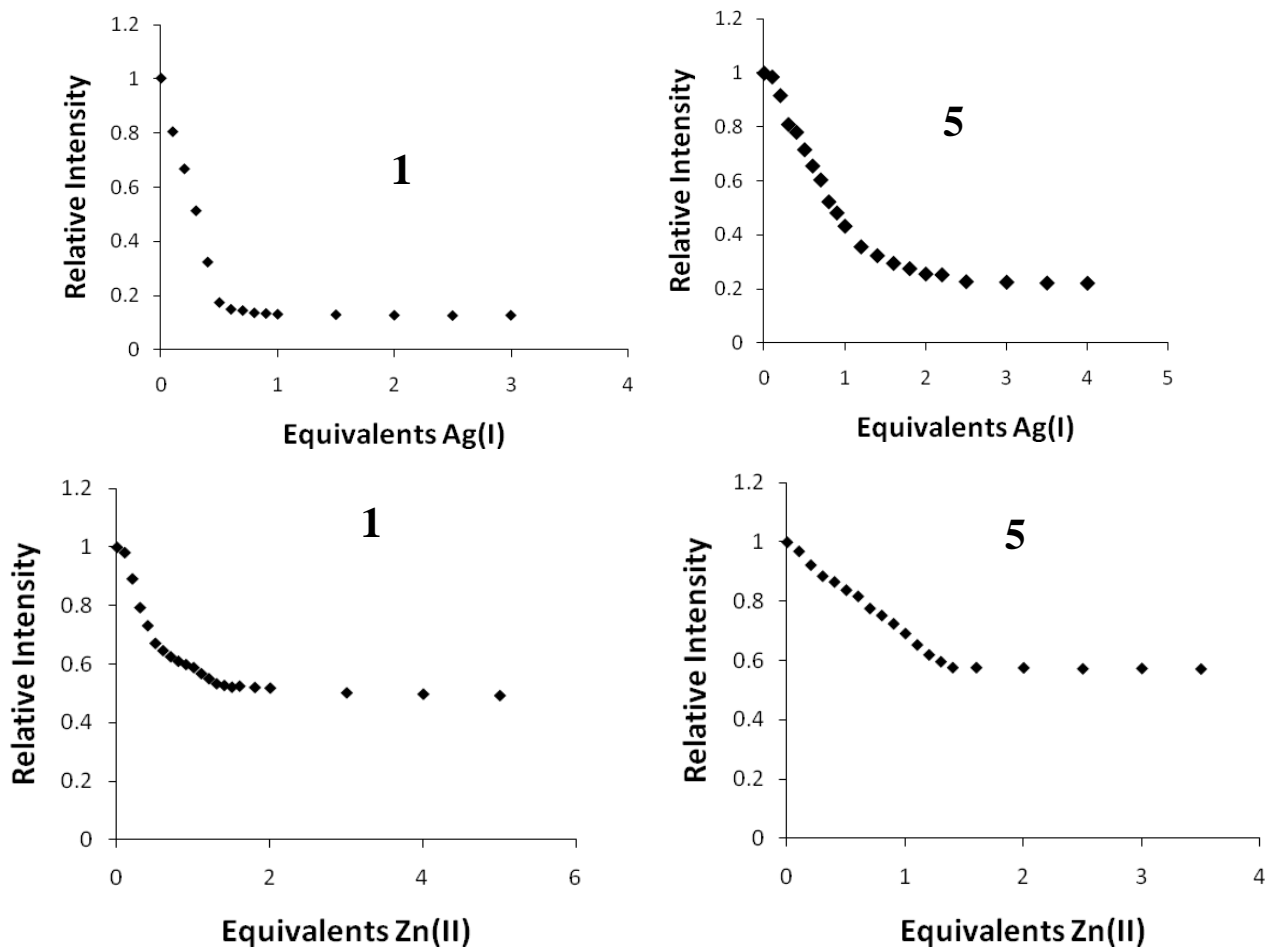

## S6. Crystal structural data for compounds **2** and **5**

### Crystal data and structure refinement for **2**.

Table 1. Crystal data and structure refinement for compound **2**.

|                                   |                                                |          |
|-----------------------------------|------------------------------------------------|----------|
| Identification code               | compound <b>2</b>                              |          |
| Empirical formula                 | C <sub>27</sub> H <sub>18</sub> N <sub>6</sub> |          |
| Formula weight                    | 426.47                                         |          |
| Temperature                       | 180(2) K                                       |          |
| Wavelength                        | 0.71073 Å                                      |          |
| Crystal system                    | Orthorhombic                                   |          |
| Space group                       | Pca2(1)                                        |          |
| Unit cell dimensions              | a = 16.7951(9) Å                               | α = 90°. |
|                                   | b = 16.5308(12) Å                              | β = 90°. |
|                                   | c = 7.4080(5) Å                                | γ = 90°. |
| Volume                            | 2056.7(2) Å <sup>3</sup>                       |          |
| Z                                 | 4                                              |          |
| Density (calculated)              | 1.377 Mg/m <sup>3</sup>                        |          |
| Absorption coefficient            | 0.085 mm <sup>-1</sup>                         |          |
| F(000)                            | 888                                            |          |
| Crystal size                      | 0.20 x 0.05 x 0.05 mm <sup>3</sup>             |          |
| Theta range for data collection   | 2.43 to 27.05°.                                |          |
| Index ranges                      | -21 ≤ h ≤ 17, -12 ≤ k ≤ 21, -9 ≤ l ≤ 9         |          |
| Reflections collected             | 7922                                           |          |
| Independent reflections           | 3955 [R(int) = 0.0562]                         |          |
| Completeness to theta = 27.05°    | 99.4 %                                         |          |
| Absorption correction             | Semi-empirical from equivalents                |          |
| Max. and min. transmission        | 0.9957 and 0.9831                              |          |
| Refinement method                 | Full-matrix least-squares on F <sup>2</sup>    |          |
| Data / restraints / parameters    | 3955 / 1 / 299                                 |          |
| Goodness-of-fit on F <sup>2</sup> | 1.029                                          |          |
| Final R indices [I > 2σ(I)]       | R1 = 0.0449, wR2 = 0.0922                      |          |
| R indices (all data)              | R1 = 0.0667, wR2 = 0.1029                      |          |
| Absolute structure parameter      | 4(3)                                           |          |
| Largest diff. peak and hole       | 0.174 and -0.255 e.Å <sup>-3</sup>             |          |

Table 2. Atomic coordinates ( $\times 10^4$ ) and equivalent isotropic displacement parameters ( $\text{\AA}^2 \times 10^3$ ) for compound 2.  $U(\text{eq})$  is defined as one third of the trace of the orthogonalized  $U^{ij}$  tensor.

|       | x       | y       | z        | U(eq) |
|-------|---------|---------|----------|-------|
| N(1)  | 4444(1) | 3529(1) | 6491(3)  | 28(1) |
| N(2)  | 4340(1) | 4727(1) | 7917(3)  | 33(1) |
| N(3)  | 6846(1) | 2242(1) | 4422(3)  | 27(1) |
| N(4)  | 4260(1) | 1281(1) | 2262(3)  | 27(1) |
| N(5)  | 8051(1) | 1728(1) | 5071(4)  | 36(1) |
| N(6)  | 3155(1) | 627(1)  | 1336(3)  | 34(1) |
| C(1)  | 3890(2) | 4150(1) | 8822(4)  | 29(1) |
| C(2)  | 3432(2) | 4225(2) | 10384(4) | 38(1) |
| C(3)  | 3049(2) | 3549(2) | 11026(4) | 41(1) |
| C(4)  | 3117(2) | 2799(2) | 10150(4) | 37(1) |
| C(5)  | 3569(2) | 2708(1) | 8613(4)  | 31(1) |
| C(6)  | 3945(1) | 3398(1) | 7964(3)  | 26(1) |
| C(7)  | 4663(2) | 4336(1) | 6580(4)  | 33(1) |
| C(8)  | 8119(1) | 2560(1) | 4771(4)  | 29(1) |
| C(9)  | 8788(1) | 3061(1) | 4860(4)  | 35(1) |
| C(10) | 8681(2) | 3872(1) | 4535(4)  | 38(1) |
| C(11) | 7933(2) | 4192(1) | 4088(4)  | 37(1) |
| C(12) | 7263(2) | 3712(1) | 3993(4)  | 33(1) |
| C(13) | 7375(1) | 2894(1) | 4362(3)  | 27(1) |
| C(14) | 7295(1) | 1575(1) | 4850(4)  | 33(1) |
| C(15) | 3715(1) | 643(1)  | -64(4)   | 28(1) |
| C(16) | 3643(2) | 350(1)  | -1824(4) | 31(1) |
| C(17) | 4286(2) | 450(1)  | -2966(4) | 34(1) |
| C(18) | 4981(2) | 826(1)  | -2372(3) | 33(1) |
| C(19) | 5057(1) | 1134(1) | -658(4)  | 28(1) |
| C(20) | 4410(1) | 1042(1) | 488(3)   | 24(1) |
| C(21) | 3504(2) | 1010(1) | 2656(4)  | 31(1) |
| C(22) | 4808(1) | 2931(1) | 5372(4)  | 28(1) |
| C(23) | 4353(1) | 2410(1) | 4356(4)  | 26(1) |
| C(24) | 4730(1) | 1808(1) | 3350(3)  | 24(1) |
| C(25) | 5556(1) | 1739(1) | 3353(3)  | 26(1) |



|       |         |         |         |       |
|-------|---------|---------|---------|-------|
| C(26) | 5997(1) | 2288(1) | 4351(3) | 26(1) |
| C(27) | 5633(1) | 2882(1) | 5388(4) | 28(1) |

Table 3. Bond lengths [Å] and angles [°] for compound 2.

|             |          |                 |            |
|-------------|----------|-----------------|------------|
| N(1)-C(7)   | 1.385(3) | C(10)-H(10A)    | 0.9500     |
| N(1)-C(6)   | 1.392(3) | C(11)-C(12)     | 1.377(3)   |
| N(1)-C(22)  | 1.428(3) | C(11)-H(11A)    | 0.9500     |
| N(2)-C(7)   | 1.301(3) | C(12)-C(13)     | 1.394(3)   |
| N(2)-C(1)   | 1.391(3) | C(12)-H(12A)    | 0.9500     |
| N(3)-C(14)  | 1.372(3) | C(14)-H(14A)    | 0.9500     |
| N(3)-C(13)  | 1.397(3) | C(15)-C(16)     | 1.396(4)   |
| N(3)-C(26)  | 1.429(3) | C(15)-C(20)     | 1.402(3)   |
| N(4)-C(21)  | 1.378(3) | C(16)-C(17)     | 1.382(4)   |
| N(4)-C(20)  | 1.396(3) | C(16)-H(16A)    | 0.9500     |
| N(4)-C(24)  | 1.425(3) | C(17)-C(18)     | 1.395(4)   |
| N(5)-C(14)  | 1.305(3) | C(17)-H(17A)    | 0.9500     |
| N(5)-C(8)   | 1.399(3) | C(18)-C(19)     | 1.374(4)   |
| N(6)-C(21)  | 1.304(3) | C(18)-H(18A)    | 0.9500     |
| N(6)-C(15)  | 1.401(3) | C(19)-C(20)     | 1.387(3)   |
| C(1)-C(2)   | 1.396(4) | C(19)-H(19A)    | 0.9500     |
| C(1)-C(6)   | 1.398(3) | C(21)-H(21A)    | 0.9500     |
| C(2)-C(3)   | 1.374(4) | C(22)-C(23)     | 1.376(3)   |
| C(2)-H(2A)  | 0.9500   | C(22)-C(27)     | 1.387(3)   |
| C(3)-C(4)   | 1.404(4) | C(23)-C(24)     | 1.395(3)   |
| C(3)-H(3A)  | 0.9500   | C(23)-H(23A)    | 0.9500     |
| C(4)-C(5)   | 1.377(4) | C(24)-C(25)     | 1.394(3)   |
| C(4)-H(4A)  | 0.9500   | C(25)-C(26)     | 1.384(3)   |
| C(5)-C(6)   | 1.391(3) | C(25)-H(25A)    | 0.9500     |
| C(5)-H(5A)  | 0.9500   | C(26)-C(27)     | 1.390(3)   |
| C(7)-H(7A)  | 0.9500   | C(27)-H(27A)    | 0.9500     |
| C(8)-C(9)   | 1.397(3) |                 |            |
| C(8)-C(13)  | 1.400(3) | C(7)-N(1)-C(6)  | 105.8(2)   |
| C(9)-C(10)  | 1.373(3) | C(7)-N(1)-C(22) | 125.5(2)   |
| C(9)-H(9A)  | 0.9500   | C(6)-N(1)-C(22) | 127.25(19) |
| C(10)-C(11) | 1.404(4) | C(7)-N(2)-C(1)  | 104.58(19) |

|                  |            |                    |            |
|------------------|------------|--------------------|------------|
| C(14)-N(3)-C(13) | 106.12(18) | C(9)-C(10)-H(10A)  | 119.1      |
| C(14)-N(3)-C(26) | 126.82(18) | C(11)-C(10)-H(10A) | 119.1      |
| C(13)-N(3)-C(26) | 126.31(17) | C(12)-C(11)-C(10)  | 121.8(2)   |
| C(21)-N(4)-C(20) | 105.9(2)   | C(12)-C(11)-H(11A) | 119.1      |
| C(21)-N(4)-C(24) | 126.1(2)   | C(10)-C(11)-H(11A) | 119.1      |
| C(20)-N(4)-C(24) | 127.3(2)   | C(11)-C(12)-C(13)  | 116.0(2)   |
| C(14)-N(5)-C(8)  | 104.44(19) | C(11)-C(12)-H(12A) | 122.0      |
| C(21)-N(6)-C(15) | 104.10(19) | C(13)-C(12)-H(12A) | 122.0      |
| N(2)-C(1)-C(2)   | 129.6(2)   | C(12)-C(13)-N(3)   | 132.1(2)   |
| N(2)-C(1)-C(6)   | 110.8(2)   | C(12)-C(13)-C(8)   | 123.0(2)   |
| C(2)-C(1)-C(6)   | 119.6(2)   | N(3)-C(13)-C(8)    | 104.90(18) |
| C(3)-C(2)-C(1)   | 118.2(2)   | N(5)-C(14)-N(3)    | 114.1(2)   |
| C(3)-C(2)-H(2A)  | 120.9      | N(5)-C(14)-H(14A)  | 122.9      |
| C(1)-C(2)-H(2A)  | 120.9      | N(3)-C(14)-H(14A)  | 122.9      |
| C(2)-C(3)-C(4)   | 121.3(3)   | C(16)-C(15)-N(6)   | 128.8(2)   |
| C(2)-C(3)-H(3A)  | 119.3      | C(16)-C(15)-C(20)  | 120.5(2)   |
| C(4)-C(3)-H(3A)  | 119.3      | N(6)-C(15)-C(20)   | 110.6(2)   |
| C(5)-C(4)-C(3)   | 121.7(2)   | C(17)-C(16)-C(15)  | 117.6(2)   |
| C(5)-C(4)-H(4A)  | 119.2      | C(17)-C(16)-H(16A) | 121.2      |
| C(3)-C(4)-H(4A)  | 119.2      | C(15)-C(16)-H(16A) | 121.2      |
| C(4)-C(5)-C(6)   | 116.5(2)   | C(16)-C(17)-C(18)  | 121.0(2)   |
| C(4)-C(5)-H(5A)  | 121.8      | C(16)-C(17)-H(17A) | 119.5      |
| C(6)-C(5)-H(5A)  | 121.8      | C(18)-C(17)-H(17A) | 119.5      |
| C(5)-C(6)-N(1)   | 132.2(2)   | C(19)-C(18)-C(17)  | 122.3(3)   |
| C(5)-C(6)-C(1)   | 122.8(2)   | C(19)-C(18)-H(18A) | 118.9      |
| N(1)-C(6)-C(1)   | 105.0(2)   | C(17)-C(18)-H(18A) | 118.9      |
| N(2)-C(7)-N(1)   | 113.9(2)   | C(18)-C(19)-C(20)  | 116.9(2)   |
| N(2)-C(7)-H(7A)  | 123.1      | C(18)-C(19)-H(19A) | 121.5      |
| N(1)-C(7)-H(7A)  | 123.1      | C(20)-C(19)-H(19A) | 121.5      |
| C(9)-C(8)-N(5)   | 129.9(2)   | C(19)-C(20)-N(4)   | 133.3(2)   |
| C(9)-C(8)-C(13)  | 119.7(2)   | C(19)-C(20)-C(15)  | 121.7(2)   |
| N(5)-C(8)-C(13)  | 110.4(2)   | N(4)-C(20)-C(15)   | 104.9(2)   |
| C(10)-C(9)-C(8)  | 117.7(2)   | N(6)-C(21)-N(4)    | 114.5(2)   |
| C(10)-C(9)-H(9A) | 121.1      | N(6)-C(21)-H(21A)  | 122.8      |
| C(8)-C(9)-H(9A)  | 121.1      | N(4)-C(21)-H(21A)  | 122.8      |
| C(9)-C(10)-C(11) | 121.7(2)   | C(23)-C(22)-C(27)  | 121.5(2)   |

|                    |          |                    |          |
|--------------------|----------|--------------------|----------|
| C(23)-C(22)-N(1)   | 120.9(2) | C(26)-C(25)-H(25A) | 120.7    |
| C(27)-C(22)-N(1)   | 117.6(2) | C(24)-C(25)-H(25A) | 120.7    |
| C(22)-C(23)-C(24)  | 119.1(2) | C(25)-C(26)-C(27)  | 121.6(2) |
| C(22)-C(23)-H(23A) | 120.4    | C(25)-C(26)-N(3)   | 121.2(2) |
| C(24)-C(23)-H(23A) | 120.4    | C(27)-C(26)-N(3)   | 117.2(2) |
| C(25)-C(24)-C(23)  | 120.6(2) | C(22)-C(27)-C(26)  | 118.4(2) |
| C(25)-C(24)-N(4)   | 120.2(2) | C(22)-C(27)-H(27A) | 120.8    |
| C(23)-C(24)-N(4)   | 119.2(2) | C(26)-C(27)-H(27A) | 120.8    |
| C(26)-C(25)-C(24)  | 118.7(2) |                    |          |

Table 4. Anisotropic displacement parameters ( $\text{\AA}^2 \times 10^3$ ) for compound 2. The anisotropic displacement factor exponent takes the form:  $-2\pi^2 [ h^2 a^{*2} U^{11} + \dots + 2 h k a^* b^* U^{12} ]$

|       | $U^{11}$ | $U^{22}$ | $U^{33}$ | $U^{23}$ | $U^{13}$ | $U^{12}$ |
|-------|----------|----------|----------|----------|----------|----------|
| N(1)  | 28(1)    | 26(1)    | 29(1)    | -2(1)    | 4(1)     | 1(1)     |
| N(2)  | 36(1)    | 26(1)    | 38(1)    | -2(1)    | 5(1)     | 2(1)     |
| N(3)  | 22(1)    | 28(1)    | 30(1)    | -2(1)    | -2(1)    | -1(1)    |
| N(4)  | 22(1)    | 31(1)    | 26(1)    | -1(1)    | 1(1)     | -1(1)    |
| N(5)  | 27(1)    | 33(1)    | 48(1)    | -4(1)    | -7(1)    | 1(1)     |
| N(6)  | 26(1)    | 39(1)    | 37(1)    | -1(1)    | -1(1)    | -4(1)    |
| C(1)  | 30(1)    | 28(1)    | 29(1)    | -1(1)    | -2(1)    | 5(1)     |
| C(2)  | 41(2)    | 35(1)    | 37(2)    | -3(1)    | 7(2)     | 8(1)     |
| C(3)  | 40(2)    | 48(2)    | 35(2)    | 5(1)     | 11(2)    | 10(1)    |
| C(4)  | 33(1)    | 38(1)    | 38(2)    | 10(1)    | 7(2)     | 2(1)     |
| C(5)  | 32(2)    | 27(1)    | 35(1)    | 1(1)     | -2(1)    | 4(1)     |
| C(6)  | 23(1)    | 30(1)    | 26(1)    | 2(1)     | -1(1)    | 4(1)     |
| C(7)  | 35(2)    | 29(1)    | 35(2)    | 4(1)     | 5(1)     | 2(1)     |
| C(8)  | 27(1)    | 32(1)    | 28(2)    | -2(1)    | -2(1)    | -1(1)    |
| C(9)  | 28(1)    | 43(1)    | 34(2)    | -7(1)    | -3(1)    | -5(1)    |
| C(10) | 39(2)    | 41(1)    | 34(2)    | -5(1)    | 6(1)     | -15(1)   |
| C(11) | 46(2)    | 31(1)    | 35(2)    | 2(1)     | 9(1)     | -6(1)    |
| C(12) | 35(2)    | 33(1)    | 31(1)    | 1(1)     | 2(1)     | 0(1)     |
| C(13) | 28(1)    | 30(1)    | 23(1)    | -4(1)    | -2(1)    | -3(1)    |
| C(14) | 29(2)    | 29(1)    | 40(2)    | -1(1)    | -5(1)    | 2(1)     |
| C(15) | 28(1)    | 23(1)    | 32(1)    | 1(1)     | -5(1)    | -1(1)    |

|       |       |       |       |       |       |       |
|-------|-------|-------|-------|-------|-------|-------|
| C(16) | 32(2) | 26(1) | 36(2) | -2(1) | -9(1) | 0(1)  |
| C(17) | 44(2) | 32(1) | 25(1) | -3(1) | -8(1) | 9(1)  |
| C(18) | 36(2) | 34(1) | 28(1) | 2(1)  | 3(1)  | 7(1)  |
| C(19) | 23(1) | 30(1) | 30(1) | 2(1)  | -1(1) | 2(1)  |
| C(20) | 23(1) | 23(1) | 25(1) | 1(1)  | -1(1) | 4(1)  |
| C(21) | 24(1) | 36(1) | 33(1) | 3(1)  | 5(1)  | -3(1) |
| C(22) | 29(1) | 28(1) | 26(1) | 2(1)  | 2(1)  | 5(1)  |
| C(23) | 23(1) | 30(1) | 26(1) | 3(1)  | -2(1) | 0(1)  |
| C(24) | 22(1) | 28(1) | 23(1) | 2(1)  | -2(1) | -2(1) |
| C(25) | 25(1) | 26(1) | 26(1) | -2(1) | -2(1) | 0(1)  |
| C(26) | 24(1) | 28(1) | 26(1) | 2(1)  | -2(1) | 1(1)  |
| C(27) | 30(1) | 28(1) | 26(1) | -1(1) | -2(1) | -2(1) |

Table 5. Hydrogen coordinates ( $\times 10^4$ ) and isotropic displacement parameters ( $\text{\AA}^2 \times 10^3$ ) for compound 2.

|        | x    | y    | z     | U(eq) |
|--------|------|------|-------|-------|
| H(2A)  | 3386 | 4730 | 10988 | 45    |
| H(3A)  | 2731 | 3590 | 12083 | 49    |
| H(4A)  | 2845 | 2344 | 10630 | 44    |
| H(5A)  | 3621 | 2199 | 8027  | 38    |
| H(7A)  | 5016 | 4581 | 5742  | 40    |
| H(9A)  | 9299 | 2848 | 5136  | 42    |
| H(10A) | 9126 | 4226 | 4615  | 45    |
| H(11A) | 7886 | 4754 | 3845  | 45    |
| H(12A) | 6755 | 3927 | 3694  | 40    |
| H(14A) | 7074 | 1049 | 4975  | 39    |
| H(16A) | 3169 | 92   | -2222 | 38    |
| H(17A) | 4253 | 261  | -4175 | 40    |
| H(18A) | 5419 | 870  | -3179 | 39    |
| H(19A) | 5530 | 1398 | -275  | 33    |
| H(21A) | 3258 | 1094 | 3795  | 37    |
| H(23A) | 3789 | 2459 | 4340  | 32    |
| H(25A) | 5813 | 1324 | 2683  | 31    |
| H(27A) | 5941 | 3247 | 6091  | 34    |

Unit cell packing diagram of **2** projected down the c axis:

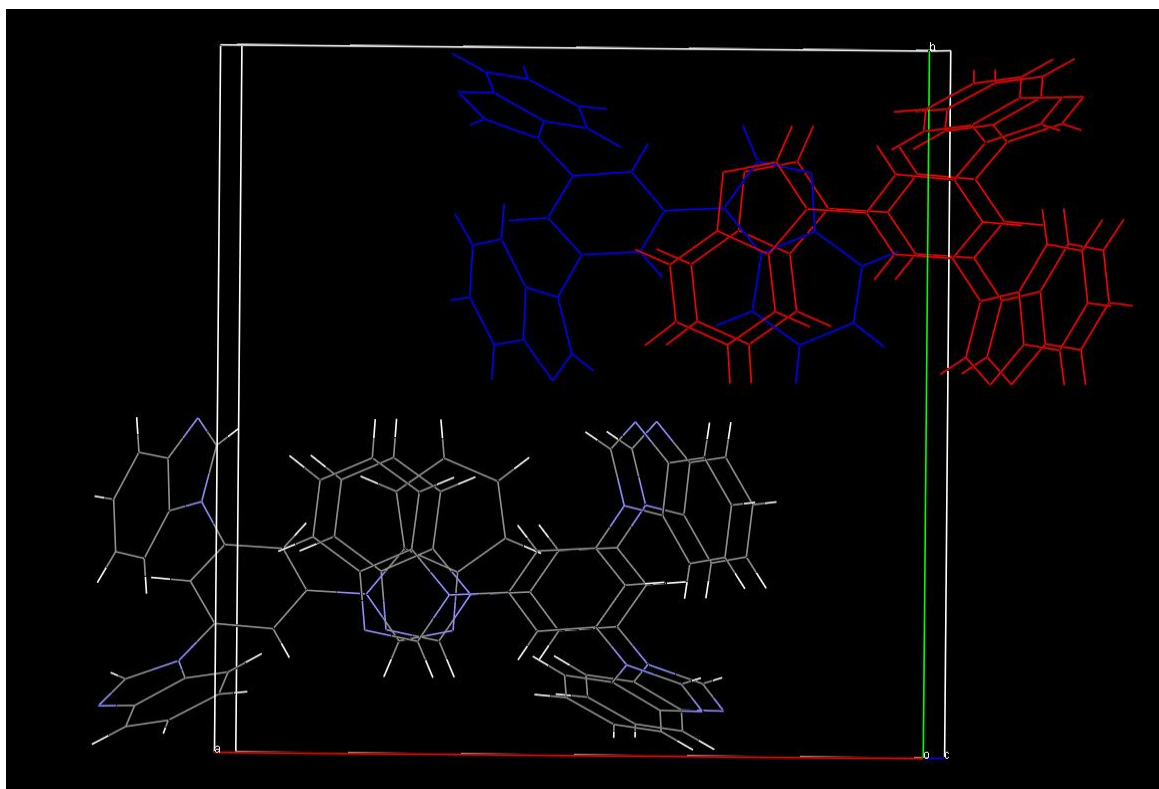

### Crystal data and structure refinement for 5.

Table 3.1. Crystal data and structure refinement for Compound 5.

|                                   |                                                                 |                   |
|-----------------------------------|-----------------------------------------------------------------|-------------------|
| Identification code               | Compound 5/CH <sub>2</sub> Cl <sub>2</sub>                      |                   |
| Empirical formula                 | C <sub>85</sub> H <sub>56</sub> Cl <sub>2</sub> N <sub>12</sub> |                   |
| Formula weight                    | 1316.32                                                         |                   |
| Temperature                       | 180(2) K                                                        |                   |
| Wavelength                        | 0.71073 Å                                                       |                   |
| Crystal system                    | Monoclinic                                                      |                   |
| Space group                       | P2(1)/c                                                         |                   |
| Unit cell dimensions              | a = 13.2011(16) Å                                               | α = 90°.          |
|                                   | b = 9.2379(11) Å                                                | β = 93.0210(10)°. |
|                                   | c = 56.398(7) Å                                                 | γ = 90°.          |
| Volume                            | 6868.2(14) Å <sup>3</sup>                                       |                   |
| Z                                 | 4                                                               |                   |
| Density (calculated)              | 1.273 Mg/m <sup>3</sup>                                         |                   |
| Absorption coefficient            | 0.152 mm <sup>-1</sup>                                          |                   |
| F(000)                            | 2736                                                            |                   |
| Crystal size                      | 0.35 x 0.20 x 0.06 mm <sup>3</sup>                              |                   |
| Theta range for data collection   | 1.45 to 24.21°.                                                 |                   |
| Index ranges                      | -15 ≤ h ≤ 15, -10 ≤ k ≤ 10, -64 ≤ l ≤ 64                        |                   |
| Reflections collected             | 59676                                                           |                   |
| Independent reflections           | 10992 [R(int) = 0.0420]                                         |                   |
| Completeness to theta = 24.21°    | 99.2 %                                                          |                   |
| Absorption correction             | Semi-empirical from equivalents                                 |                   |
| Max. and min. transmission        | 0.9910 and 0.9488                                               |                   |
| Refinement method                 | Full-matrix least-squares on F <sup>2</sup>                     |                   |
| Data / restraints / parameters    | 10992 / 1 / 895                                                 |                   |
| Goodness-of-fit on F <sup>2</sup> | 1.086                                                           |                   |
| Final R indices [I > 2σ(I)]       | R1 = 0.0950, wR2 = 0.2432                                       |                   |
| R indices (all data)              | R1 = 0.1140, wR2 = 0.2554                                       |                   |
| Largest diff. peak and hole       | 0.671 and -1.088 e.Å <sup>-3</sup>                              |                   |

Table 3.2. Atomic coordinates ( $\times 10^4$ ) and equivalent isotropic displacement parameters ( $\text{\AA}^2 \times 10^3$ ) for Compound 5.  $U(\text{eq})$  is defined as one third of the trace of the orthogonalized  $U^{ij}$  tensor.

|       | x       | y        | z       | U(eq)  |
|-------|---------|----------|---------|--------|
| Cl(1) | 7994(2) | 5479(3)  | 1705(1) | 149(1) |
| Cl(2) | 6968(2) | 4792(4)  | 1249(1) | 165(1) |
| C(1)  | 5782(3) | 9060(5)  | 1237(1) | 33(1)  |
| C(2)  | 6345(3) | 9190(4)  | 1033(1) | 29(1)  |
| C(3)  | 7315(3) | 9788(4)  | 1051(1) | 29(1)  |
| C(4)  | 7766(3) | 10157(5) | 1278(1) | 33(1)  |
| C(5)  | 7207(3) | 10016(5) | 1480(1) | 36(1)  |
| C(6)  | 6207(3) | 9497(5)  | 1458(1) | 35(1)  |
| C(7)  | 4728(3) | 8452(4)  | 1219(1) | 32(1)  |
| C(8)  | 3987(3) | 9054(5)  | 1063(1) | 34(1)  |
| C(9)  | 3022(3) | 8477(5)  | 1042(1) | 35(1)  |
| C(10) | 2783(3) | 7296(5)  | 1181(1) | 36(1)  |
| C(11) | 3509(3) | 6681(5)  | 1336(1) | 41(1)  |
| C(12) | 4474(3) | 7257(5)  | 1354(1) | 38(1)  |
| C(13) | 1157(4) | 6559(6)  | 1349(1) | 59(1)  |
| C(14) | 270(4)  | 5936(5)  | 1038(1) | 56(1)  |
| C(15) | -491(4) | 5488(6)  | 867(2)  | 78(2)  |
| C(16) | -255(6) | 5481(6)  | 635(2)  | 83(2)  |
| C(17) | 688(5)  | 5838(6)  | 562(1)  | 71(2)  |
| C(18) | 1452(4) | 6257(5)  | 725(1)  | 55(1)  |
| C(19) | 1216(4) | 6322(5)  | 962(1)  | 46(1)  |
| C(20) | 5936(3) | 8652(4)  | 797(1)  | 29(1)  |
| C(21) | 5786(3) | 9564(4)  | 600(1)  | 31(1)  |
| C(22) | 5406(3) | 9028(5)  | 385(1)  | 32(1)  |
| C(23) | 5187(3) | 7564(4)  | 358(1)  | 29(1)  |
| C(24) | 5333(3) | 6643(4)  | 550(1)  | 33(1)  |
| C(25) | 5691(3) | 7181(5)  | 767(1)  | 35(1)  |
| C(26) | 5105(3) | 7461(5)  | -82(1)  | 34(1)  |
| C(27) | 3799(3) | 6171(4)  | -159(1) | 33(1)  |
| C(28) | 2982(3) | 5411(5)  | -265(1) | 41(1)  |
| C(29) | 2350(3) | 4682(5)  | -120(1) | 46(1)  |

|       |          |           |         |        |
|-------|----------|-----------|---------|--------|
| C(30) | 2517(3)  | 4684(5)   | 124(1)  | 46(1)  |
| C(31) | 3320(3)  | 5443(5)   | 237(1)  | 40(1)  |
| C(32) | 3948(3)  | 6185(4)   | 88(1)   | 30(1)  |
| C(33) | 7916(3)  | 10089(4)  | 839(1)  | 31(1)  |
| C(34) | 8374(3)  | 8994(5)   | 714(1)  | 33(1)  |
| C(35) | 9027(3)  | 9311(4)   | 537(1)  | 32(1)  |
| C(36) | 9222(3)  | 10745(4)  | 482(1)  | 31(1)  |
| C(37) | 8742(3)  | 11851(4)  | 603(1)  | 35(1)  |
| C(38) | 8100(3)  | 11511(5)  | 778(1)  | 36(1)  |
| C(39) | 9762(3)  | 12143(4)  | 132(1)  | 33(1)  |
| C(40) | 11214(3) | 11233(4)  | 79(1)   | 32(1)  |
| C(41) | 12162(3) | 10857(5)  | -6(1)   | 37(1)  |
| C(42) | 12696(3) | 9779(5)   | 110(1)  | 41(1)  |
| C(43) | 12336(3) | 9109(5)   | 311(1)  | 43(1)  |
| C(44) | 11407(3) | 9456(5)   | 397(1)  | 38(1)  |
| C(45) | 10853(3) | 10517(4)  | 272(1)  | 30(1)  |
| C(46) | 8836(3)  | 10695(5)  | 1293(1) | 33(1)  |
| C(47) | 9614(3)  | 9825(5)   | 1218(1) | 39(1)  |
| C(48) | 10591(3) | 10351(5)  | 1217(1) | 43(1)  |
| C(49) | 10798(3) | 11740(5)  | 1293(1) | 36(1)  |
| C(50) | 10042(3) | 12601(5)  | 1374(1) | 37(1)  |
| C(51) | 9066(3)  | 12082(5)  | 1376(1) | 37(1)  |
| C(52) | 12431(4) | 12733(5)  | 1472(1) | 49(1)  |
| C(53) | 13334(3) | 12942(5)  | 1173(1) | 42(1)  |
| C(54) | 14090(4) | 13181(6)  | 1014(1) | 57(1)  |
| C(55) | 13878(5) | 12887(6)  | 778(1)  | 61(2)  |
| C(56) | 12938(4) | 12359(6)  | 697(1)  | 53(1)  |
| C(57) | 12177(4) | 12129(5)  | 848(1)  | 45(1)  |
| C(58) | 12393(3) | 12414(5)  | 1088(1) | 37(1)  |
| C(59) | 7669(3)  | 10367(5)  | 1720(1) | 42(1)  |
| C(60) | 8472(4)  | 9538(6)   | 1817(1) | 52(1)  |
| C(61) | 8804(4)  | 9712(8)   | 2050(1) | 69(2)  |
| C(62) | 8367(4)  | 10740(9)  | 2186(1) | 73(2)  |
| C(63) | 7613(4)  | 11651(8)  | 2089(1) | 65(2)  |
| C(64) | 7271(4)  | 11465(6)  | 1856(1) | 48(1)  |
| C(65) | 8813(5)  | 12079(13) | 2554(1) | 127(4) |



|       |          |           |         |        |
|-------|----------|-----------|---------|--------|
| C(66) | 9143(7)  | 10351(19) | 2806(1) | 141(5) |
| C(67) | 9418(8)  | 9620(20)  | 3010(2) | 167(7) |
| C(68) | 9376(9)  | 8040(20)  | 2985(2) | 162(7) |
| C(69) | 9055(6)  | 7359(14)  | 2771(1) | 127(4) |
| C(70) | 8797(6)  | 8190(15)  | 2568(1) | 113(4) |
| C(71) | 8886(5)  | 9665(13)  | 2598(1) | 93(3)  |
| C(72) | 5633(3)  | 9425(5)   | 1680(1) | 36(1)  |
| C(73) | 4898(4)  | 10435(6)  | 1722(1) | 47(1)  |
| C(74) | 4484(4)  | 10532(6)  | 1944(1) | 55(1)  |
| C(75) | 4796(4)  | 9578(6)   | 2122(1) | 50(1)  |
| C(76) | 5487(4)  | 8512(6)   | 2079(1) | 53(1)  |
| C(77) | 5910(4)  | 8455(6)   | 1857(1) | 47(1)  |
| C(78) | 3426(4)  | 9893(9)   | 2406(1) | 81(2)  |
| C(79) | 4224(5)  | 9697(7)   | 2740(1) | 69(2)  |
| C(80) | 4524(6)  | 9645(7)   | 2980(1) | 74(2)  |
| C(81) | 5542(6)  | 9515(8)   | 3042(1) | 82(2)  |
| C(82) | 6256(6)  | 9467(10)  | 2871(1) | 97(2)  |
| C(83) | 5980(5)  | 9500(9)   | 2629(1) | 83(2)  |
| C(84) | 4954(4)  | 9594(7)   | 2569(1) | 61(2)  |
| C(85) | 7868(9)  | 5971(9)   | 1426(2) | 142(4) |
| N(1)  | 1782(3)  | 6705(4)   | 1166(1) | 43(1)  |
| N(2)  | 251(3)   | 6096(5)   | 1284(1) | 68(1)  |
| N(3)  | 4798(2)  | 7051(4)   | 134(1)  | 30(1)  |
| N(4)  | 4546(3)  | 6983(4)   | -264(1) | 37(1)  |
| N(5)  | 9906(2)  | 11114(4)  | 305(1)  | 32(1)  |
| N(6)  | 10512(2) | 12266(4)  | -9(1)   | 34(1)  |
| N(7)  | 11819(3) | 12283(4)  | 1286(1) | 41(1)  |
| N(8)  | 13334(3) | 13139(5)  | 1418(1) | 50(1)  |
| N(9)  | 8680(4)  | 10859(9)  | 2432(1) | 100(2) |
| N(10) | 9113(5)  | 11923(13) | 2780(1) | 127(4) |
| N(11) | 4404(4)  | 9686(6)   | 2353(1) | 64(1)  |
| N(12) | 3269(4)  | 9871(8)   | 2632(1) | 91(2)  |

---

Table 3.3. Bond lengths [ $\text{\AA}$ ] and angles [ $^\circ$ ] for Compound 5.

|             |           |             |          |
|-------------|-----------|-------------|----------|
| Cl(1)-C(85) | 1.635(10) | C(22)-C(23) | 1.390(6) |
| Cl(2)-C(85) | 1.864(12) | C(23)-C(24) | 1.379(6) |
| C(1)-C(6)   | 1.397(6)  | C(23)-N(3)  | 1.422(5) |
| C(1)-C(2)   | 1.410(6)  | C(24)-C(25) | 1.384(6) |
| C(1)-C(7)   | 1.500(6)  | C(26)-N(4)  | 1.306(5) |
| C(2)-C(3)   | 1.394(6)  | C(26)-N(3)  | 1.359(5) |
| C(2)-C(20)  | 1.492(5)  | C(27)-N(4)  | 1.394(5) |
| C(3)-C(4)   | 1.421(6)  | C(27)-C(32) | 1.395(6) |
| C(3)-C(33)  | 1.499(5)  | C(27)-C(28) | 1.396(6) |
| C(4)-C(5)   | 1.397(6)  | C(28)-C(29) | 1.375(7) |
| C(4)-C(46)  | 1.496(6)  | C(29)-C(30) | 1.380(7) |
| C(5)-C(6)   | 1.404(6)  | C(30)-C(31) | 1.396(6) |
| C(5)-C(59)  | 1.491(6)  | C(31)-C(32) | 1.392(6) |
| C(6)-C(72)  | 1.499(6)  | C(32)-N(3)  | 1.391(5) |
| C(7)-C(12)  | 1.391(6)  | C(33)-C(38) | 1.383(6) |
| C(7)-C(8)   | 1.396(6)  | C(33)-C(34) | 1.389(6) |
| C(8)-C(9)   | 1.380(6)  | C(34)-C(35) | 1.380(6) |
| C(9)-C(10)  | 1.388(6)  | C(35)-C(36) | 1.389(6) |
| C(10)-C(11) | 1.385(6)  | C(36)-C(37) | 1.397(6) |
| C(10)-N(1)  | 1.429(5)  | C(36)-N(5)  | 1.423(5) |
| C(11)-C(12) | 1.379(6)  | C(37)-C(38) | 1.371(6) |
| C(13)-N(2)  | 1.306(7)  | C(39)-N(6)  | 1.307(5) |
| C(13)-N(1)  | 1.363(6)  | C(39)-N(5)  | 1.367(5) |
| C(14)-C(19) | 1.390(7)  | C(40)-C(45) | 1.383(6) |
| C(14)-N(2)  | 1.396(8)  | C(40)-N(6)  | 1.401(5) |
| C(14)-C(15) | 1.418(8)  | C(40)-C(41) | 1.407(6) |
| C(15)-C(16) | 1.357(10) | C(41)-C(42) | 1.368(6) |
| C(16)-C(17) | 1.374(10) | C(42)-C(43) | 1.393(6) |
| C(17)-C(18) | 1.384(8)  | C(43)-C(44) | 1.380(6) |
| C(18)-C(19) | 1.389(7)  | C(44)-C(45) | 1.391(6) |
| C(19)-N(1)  | 1.384(6)  | C(45)-N(5)  | 1.387(5) |
| C(20)-C(21) | 1.399(6)  | C(46)-C(47) | 1.388(6) |
| C(20)-C(25) | 1.405(6)  | C(46)-C(51) | 1.391(6) |
| C(21)-C(22) | 1.383(6)  | C(47)-C(48) | 1.378(6) |

|             |           |                 |           |
|-------------|-----------|-----------------|-----------|
| C(48)-C(49) | 1.376(6)  | C(75)-N(11)     | 1.434(6)  |
| C(49)-C(50) | 1.373(6)  | C(76)-C(77)     | 1.398(6)  |
| C(49)-N(7)  | 1.441(5)  | C(78)-N(12)     | 1.299(7)  |
| C(50)-C(51) | 1.376(6)  | C(78)-N(11)     | 1.353(7)  |
| C(52)-N(8)  | 1.301(6)  | C(79)-N(12)     | 1.382(8)  |
| C(52)-N(7)  | 1.355(6)  | C(79)-C(80)     | 1.393(8)  |
| C(53)-C(54) | 1.392(7)  | C(79)-C(84)     | 1.400(7)  |
| C(53)-N(8)  | 1.395(6)  | C(80)-C(81)     | 1.376(10) |
| C(53)-C(58) | 1.396(6)  | C(81)-C(82)     | 1.383(10) |
| C(54)-C(55) | 1.372(8)  | C(82)-C(83)     | 1.395(9)  |
| C(55)-C(56) | 1.388(8)  | C(83)-C(84)     | 1.381(8)  |
| C(56)-C(57) | 1.368(7)  | C(84)-N(11)     | 1.389(7)  |
| C(57)-C(58) | 1.391(6)  |                 |           |
| C(58)-N(7)  | 1.389(6)  | C(6)-C(1)-C(2)  | 120.0(4)  |
| C(59)-C(64) | 1.390(7)  | C(6)-C(1)-C(7)  | 119.8(4)  |
| C(59)-C(60) | 1.395(7)  | C(2)-C(1)-C(7)  | 120.2(3)  |
| C(60)-C(61) | 1.373(7)  | C(3)-C(2)-C(1)  | 119.5(4)  |
| C(61)-C(62) | 1.368(9)  | C(3)-C(2)-C(20) | 119.2(3)  |
| C(62)-C(63) | 1.394(9)  | C(1)-C(2)-C(20) | 121.3(3)  |
| C(62)-N(9)  | 1.429(7)  | C(2)-C(3)-C(4)  | 120.2(4)  |
| C(63)-C(64) | 1.377(7)  | C(2)-C(3)-C(33) | 122.3(3)  |
| C(65)-N(10) | 1.323(10) | C(4)-C(3)-C(33) | 117.4(3)  |
| C(65)-N(9)  | 1.327(11) | C(5)-C(4)-C(3)  | 119.8(4)  |
| C(66)-C(71) | 1.362(12) | C(5)-C(4)-C(46) | 121.4(4)  |
| C(66)-C(67) | 1.369(16) | C(3)-C(4)-C(46) | 118.8(3)  |
| C(66)-N(10) | 1.460(15) | C(4)-C(5)-C(6)  | 119.5(4)  |
| C(67)-C(68) | 1.47(2)   | C(4)-C(5)-C(59) | 120.9(4)  |
| C(68)-C(69) | 1.407(15) | C(6)-C(5)-C(59) | 119.6(4)  |
| C(69)-C(70) | 1.405(11) | C(1)-C(6)-C(5)  | 120.7(4)  |
| C(70)-C(71) | 1.376(13) | C(1)-C(6)-C(72) | 122.3(4)  |
| C(71)-N(9)  | 1.462(12) | C(5)-C(6)-C(72) | 117.0(4)  |
| C(72)-C(73) | 1.376(7)  | C(12)-C(7)-C(8) | 118.7(4)  |
| C(72)-C(77) | 1.377(6)  | C(12)-C(7)-C(1) | 120.6(4)  |
| C(73)-C(74) | 1.393(7)  | C(8)-C(7)-C(1)  | 120.7(4)  |
| C(74)-C(75) | 1.381(7)  | C(9)-C(8)-C(7)  | 120.8(4)  |
| C(75)-C(76) | 1.372(7)  | C(8)-C(9)-C(10) | 119.4(4)  |

|                   |          |                   |          |
|-------------------|----------|-------------------|----------|
| C(11)-C(10)-C(9)  | 120.5(4) | C(31)-C(32)-C(27) | 122.7(4) |
| C(11)-C(10)-N(1)  | 119.2(4) | C(38)-C(33)-C(34) | 118.6(4) |
| C(9)-C(10)-N(1)   | 120.3(4) | C(38)-C(33)-C(3)  | 118.8(4) |
| C(12)-C(11)-C(10) | 119.7(4) | C(34)-C(33)-C(3)  | 122.3(4) |
| C(11)-C(12)-C(7)  | 120.9(4) | C(35)-C(34)-C(33) | 121.1(4) |
| N(2)-C(13)-N(1)   | 113.5(5) | C(34)-C(35)-C(36) | 119.6(4) |
| C(19)-C(14)-N(2)  | 110.1(5) | C(35)-C(36)-C(37) | 119.6(4) |
| C(19)-C(14)-C(15) | 118.7(6) | C(35)-C(36)-N(5)  | 121.2(4) |
| N(2)-C(14)-C(15)  | 131.2(6) | C(37)-C(36)-N(5)  | 119.2(4) |
| C(16)-C(15)-C(14) | 117.8(6) | C(38)-C(37)-C(36) | 119.8(4) |
| C(15)-C(16)-C(17) | 123.2(6) | C(37)-C(38)-C(33) | 121.3(4) |
| C(16)-C(17)-C(18) | 120.4(7) | N(6)-C(39)-N(5)   | 114.3(4) |
| C(17)-C(18)-C(19) | 117.4(6) | C(45)-C(40)-N(6)  | 110.8(4) |
| N(1)-C(19)-C(18)  | 132.3(4) | C(45)-C(40)-C(41) | 120.0(4) |
| N(1)-C(19)-C(14)  | 105.2(5) | N(6)-C(40)-C(41)  | 129.2(4) |
| C(18)-C(19)-C(14) | 122.5(5) | C(42)-C(41)-C(40) | 117.6(4) |
| C(21)-C(20)-C(25) | 117.7(4) | C(41)-C(42)-C(43) | 121.5(4) |
| C(21)-C(20)-C(2)  | 122.3(4) | C(44)-C(43)-C(42) | 122.0(4) |
| C(25)-C(20)-C(2)  | 120.0(4) | C(43)-C(44)-C(45) | 116.1(4) |
| C(22)-C(21)-C(20) | 120.8(4) | C(40)-C(45)-N(5)  | 105.3(4) |
| C(21)-C(22)-C(23) | 120.4(4) | C(40)-C(45)-C(44) | 122.8(4) |
| C(24)-C(23)-C(22) | 119.8(4) | N(5)-C(45)-C(44)  | 131.8(4) |
| C(24)-C(23)-N(3)  | 121.3(4) | C(47)-C(46)-C(51) | 119.0(4) |
| C(22)-C(23)-N(3)  | 118.8(4) | C(47)-C(46)-C(4)  | 120.1(4) |
| C(23)-C(24)-C(25) | 119.9(4) | C(51)-C(46)-C(4)  | 120.9(4) |
| C(24)-C(25)-C(20) | 121.3(4) | C(48)-C(47)-C(46) | 120.3(4) |
| N(4)-C(26)-N(3)   | 115.2(4) | C(49)-C(48)-C(47) | 119.8(4) |
| N(4)-C(27)-C(32)  | 110.6(4) | C(50)-C(49)-C(48) | 120.6(4) |
| N(4)-C(27)-C(28)  | 129.5(4) | C(50)-C(49)-N(7)  | 120.3(4) |
| C(32)-C(27)-C(28) | 119.9(4) | C(48)-C(49)-N(7)  | 119.1(4) |
| C(29)-C(28)-C(27) | 118.0(4) | C(49)-C(50)-C(51) | 119.9(4) |
| C(28)-C(29)-C(30) | 121.5(4) | C(50)-C(51)-C(46) | 120.4(4) |
| C(29)-C(30)-C(31) | 122.2(4) | N(8)-C(52)-N(7)   | 115.0(4) |
| C(32)-C(31)-C(30) | 115.7(4) | C(54)-C(53)-N(8)  | 130.8(4) |
| N(3)-C(32)-C(31)  | 132.2(4) | C(54)-C(53)-C(58) | 119.4(5) |
| N(3)-C(32)-C(27)  | 105.1(3) | N(8)-C(53)-C(58)  | 109.8(4) |

|                   |           |                   |          |
|-------------------|-----------|-------------------|----------|
| C(55)-C(54)-C(53) | 118.3(5)  | C(75)-C(76)-C(77) | 119.0(5) |
| C(54)-C(55)-C(56) | 121.5(5)  | C(72)-C(77)-C(76) | 121.5(5) |
| C(57)-C(56)-C(55) | 121.5(5)  | N(12)-C(78)-N(11) | 114.7(6) |
| C(56)-C(57)-C(58) | 117.2(5)  | N(12)-C(79)-C(80) | 129.8(6) |
| N(7)-C(58)-C(57)  | 132.3(4)  | N(12)-C(79)-C(84) | 110.4(5) |
| N(7)-C(58)-C(53)  | 105.6(4)  | C(80)-C(79)-C(84) | 119.7(6) |
| C(57)-C(58)-C(53) | 122.1(4)  | C(81)-C(80)-C(79) | 118.3(6) |
| C(64)-C(59)-C(60) | 119.2(4)  | C(80)-C(81)-C(82) | 121.2(6) |
| C(64)-C(59)-C(5)  | 120.6(4)  | C(81)-C(82)-C(83) | 121.9(7) |
| C(60)-C(59)-C(5)  | 120.1(4)  | C(84)-C(83)-C(82) | 116.3(6) |
| C(61)-C(60)-C(59) | 120.4(5)  | C(83)-C(84)-N(11) | 132.8(5) |
| C(62)-C(61)-C(60) | 119.8(5)  | C(83)-C(84)-C(79) | 122.5(5) |
| C(61)-C(62)-C(63) | 120.7(5)  | N(11)-C(84)-C(79) | 104.6(5) |
| C(61)-C(62)-N(9)  | 119.2(6)  | Cl(1)-C(85)-Cl(2) | 112.5(5) |
| C(63)-C(62)-N(9)  | 120.0(6)  | C(13)-N(1)-C(19)  | 106.6(4) |
| C(64)-C(63)-C(62) | 119.5(5)  | C(13)-N(1)-C(10)  | 126.0(4) |
| C(63)-C(64)-C(59) | 120.1(5)  | C(19)-N(1)-C(10)  | 127.1(4) |
| N(10)-C(65)-N(9)  | 115.6(11) | C(13)-N(2)-C(14)  | 104.6(4) |
| C(71)-C(66)-C(67) | 122.7(16) | C(26)-N(3)-C(32)  | 105.6(3) |
| C(71)-C(66)-N(10) | 111.9(10) | C(26)-N(3)-C(23)  | 126.6(3) |
| C(67)-C(66)-N(10) | 125.4(12) | C(32)-N(3)-C(23)  | 127.4(3) |
| C(66)-C(67)-C(68) | 113.7(13) | C(26)-N(4)-C(27)  | 103.5(3) |
| C(69)-C(68)-C(67) | 122.5(12) | C(39)-N(5)-C(45)  | 106.0(3) |
| C(70)-C(69)-C(68) | 120.1(13) | C(39)-N(5)-C(36)  | 126.6(3) |
| C(71)-C(70)-C(69) | 115.4(9)  | C(45)-N(5)-C(36)  | 127.4(3) |
| C(66)-C(71)-C(70) | 125.4(11) | C(39)-N(6)-C(40)  | 103.6(3) |
| C(66)-C(71)-N(9)  | 103.3(11) | C(52)-N(7)-C(58)  | 105.6(4) |
| C(70)-C(71)-N(9)  | 131.2(7)  | C(52)-N(7)-C(49)  | 127.3(4) |
| C(73)-C(72)-C(77) | 118.5(4)  | C(58)-N(7)-C(49)  | 127.1(4) |
| C(73)-C(72)-C(6)  | 120.5(4)  | C(52)-N(8)-C(53)  | 104.1(4) |
| C(77)-C(72)-C(6)  | 120.6(4)  | C(65)-N(9)-C(62)  | 126.2(8) |
| C(72)-C(73)-C(74) | 120.9(5)  | C(65)-N(9)-C(71)  | 107.1(7) |
| C(75)-C(74)-C(73) | 119.6(5)  | C(62)-N(9)-C(71)  | 126.6(7) |
| C(76)-C(75)-C(74) | 120.4(4)  | C(65)-N(10)-C(66) | 102.1(8) |
| C(76)-C(75)-N(11) | 119.1(5)  | C(78)-N(11)-C(84) | 106.0(4) |
| C(74)-C(75)-N(11) | 120.5(5)  | C(78)-N(11)-C(75) | 127.3(5) |

C(84)-N(11)-C(75) 126.7(5) C(78)-N(12)-C(79) 104.2(5)

Table 3.4. Anisotropic displacement parameters ( $\text{\AA}^2 \times 10^3$ ) for Compound 5. The anisotropic displacement factor exponent takes the form:  $-2\pi^2 [ h^2 a^{*2} U^{11} + \dots + 2 h k a^* b^* U^{12} ]$

|       | U <sup>11</sup> | U <sup>22</sup> | U <sup>33</sup> | U <sup>23</sup> | U <sup>13</sup> | U <sup>12</sup> |
|-------|-----------------|-----------------|-----------------|-----------------|-----------------|-----------------|
| Cl(1) | 148(2)          | 121(2)          | 179(3)          | -7(2)           | 24(2)           | 5(2)            |
| Cl(2) | 120(2)          | 138(2)          | 231(4)          | 15(2)           | -60(2)          | 19(2)           |
| C(1)  | 32(2)           | 38(2)           | 29(2)           | 0(2)            | 1(2)            | 2(2)            |
| C(2)  | 29(2)           | 29(2)           | 30(2)           | 0(2)            | -1(2)           | 1(2)            |
| C(3)  | 33(2)           | 28(2)           | 26(2)           | 0(2)            | 3(2)            | 4(2)            |
| C(4)  | 30(2)           | 37(2)           | 31(2)           | -1(2)           | 1(2)            | -1(2)           |
| C(5)  | 36(2)           | 44(3)           | 27(2)           | -2(2)           | -1(2)           | -2(2)           |
| C(6)  | 32(2)           | 40(2)           | 31(2)           | 1(2)            | 1(2)            | 2(2)            |
| C(7)  | 36(2)           | 33(2)           | 26(2)           | -1(2)           | 3(2)            | -3(2)           |
| C(8)  | 37(2)           | 35(2)           | 31(2)           | 2(2)            | 7(2)            | 0(2)            |
| C(9)  | 30(2)           | 39(2)           | 38(2)           | 4(2)            | 3(2)            | -2(2)           |
| C(10) | 32(2)           | 37(2)           | 41(2)           | -4(2)           | 5(2)            | 0(2)            |
| C(11) | 45(3)           | 39(3)           | 39(2)           | 5(2)            | 9(2)            | -7(2)           |
| C(12) | 38(2)           | 41(3)           | 36(2)           | 2(2)            | 2(2)            | 2(2)            |
| C(13) | 55(3)           | 54(3)           | 68(4)           | 7(3)            | 15(3)           | -14(3)          |
| C(14) | 43(3)           | 39(3)           | 87(4)           | 17(3)           | 0(3)            | -8(2)           |
| C(15) | 49(3)           | 39(3)           | 142(7)          | 17(4)           | -19(4)          | -18(3)          |
| C(16) | 100(6)          | 39(3)           | 106(6)          | 18(3)           | -48(5)          | -18(3)          |
| C(17) | 96(5)           | 36(3)           | 78(4)           | 7(3)            | -33(4)          | -15(3)          |
| C(18) | 62(3)           | 39(3)           | 61(3)           | 4(2)            | -8(3)           | -3(2)           |
| C(19) | 42(3)           | 32(2)           | 65(3)           | 11(2)           | -6(2)           | -2(2)           |
| C(20) | 24(2)           | 35(2)           | 29(2)           | -2(2)           | 2(2)            | 1(2)            |
| C(21) | 30(2)           | 29(2)           | 35(2)           | -1(2)           | 2(2)            | -3(2)           |
| C(22) | 28(2)           | 34(2)           | 33(2)           | 6(2)            | 0(2)            | 0(2)            |
| C(23) | 28(2)           | 31(2)           | 28(2)           | -1(2)           | 4(2)            | 0(2)            |
| C(24) | 39(2)           | 24(2)           | 35(2)           | 0(2)            | 3(2)            | 0(2)            |
| C(25) | 39(2)           | 34(2)           | 30(2)           | 1(2)            | 3(2)            | 1(2)            |
| C(26) | 34(2)           | 35(2)           | 32(2)           | 2(2)            | 1(2)            | 1(2)            |

|       |       |        |       |       |        |        |
|-------|-------|--------|-------|-------|--------|--------|
| C(27) | 33(2) | 30(2)  | 35(2) | 0(2)  | 0(2)   | 3(2)   |
| C(28) | 39(2) | 41(3)  | 42(3) | -5(2) | -10(2) | 2(2)   |
| C(29) | 37(3) | 39(3)  | 59(3) | -3(2) | -12(2) | -5(2)  |
| C(30) | 39(3) | 41(3)  | 58(3) | 4(2)  | 4(2)   | -10(2) |
| C(31) | 44(3) | 35(2)  | 41(2) | 0(2)  | 7(2)   | -2(2)  |
| C(32) | 29(2) | 27(2)  | 34(2) | -4(2) | 1(2)   | 0(2)   |
| C(33) | 28(2) | 33(2)  | 31(2) | -2(2) | -1(2)  | -1(2)  |
| C(34) | 35(2) | 30(2)  | 34(2) | 0(2)  | 4(2)   | -6(2)  |
| C(35) | 36(2) | 29(2)  | 32(2) | -6(2) | 8(2)   | -1(2)  |
| C(36) | 31(2) | 31(2)  | 31(2) | -1(2) | 3(2)   | -2(2)  |
| C(37) | 40(2) | 26(2)  | 38(2) | 0(2)  | 8(2)   | -1(2)  |
| C(38) | 35(2) | 34(2)  | 38(2) | -4(2) | 11(2)  | 4(2)   |
| C(39) | 32(2) | 30(2)  | 38(2) | -2(2) | 2(2)   | -2(2)  |
| C(40) | 31(2) | 33(2)  | 32(2) | -3(2) | -1(2)  | -6(2)  |
| C(41) | 32(2) | 39(2)  | 40(2) | -1(2) | 5(2)   | -9(2)  |
| C(42) | 28(2) | 37(2)  | 60(3) | -3(2) | 8(2)   | 2(2)   |
| C(43) | 39(3) | 36(2)  | 55(3) | 1(2)  | 3(2)   | 5(2)   |
| C(44) | 39(2) | 35(2)  | 39(2) | 3(2)  | 5(2)   | -2(2)  |
| C(45) | 27(2) | 30(2)  | 33(2) | -3(2) | 4(2)   | -7(2)  |
| C(46) | 32(2) | 38(2)  | 28(2) | 0(2)  | -2(2)  | -1(2)  |
| C(47) | 38(2) | 31(2)  | 48(3) | -5(2) | 3(2)   | -1(2)  |
| C(48) | 35(2) | 43(3)  | 50(3) | -6(2) | 8(2)   | 0(2)   |
| C(49) | 34(2) | 41(3)  | 33(2) | 3(2)  | 1(2)   | -6(2)  |
| C(50) | 43(3) | 36(2)  | 31(2) | -4(2) | -5(2)  | -7(2)  |
| C(51) | 40(2) | 38(2)  | 34(2) | -5(2) | 0(2)   | 3(2)   |
| C(52) | 54(3) | 50(3)  | 42(3) | -2(2) | 3(2)   | -16(2) |
| C(53) | 43(3) | 34(2)  | 49(3) | 2(2)  | 1(2)   | -12(2) |
| C(54) | 48(3) | 44(3)  | 79(4) | 4(3)  | 16(3)  | -15(2) |
| C(55) | 77(4) | 45(3)  | 64(4) | 2(3)  | 33(3)  | -11(3) |
| C(56) | 71(4) | 45(3)  | 43(3) | 6(2)  | 13(3)  | -7(3)  |
| C(57) | 55(3) | 36(3)  | 45(3) | 4(2)  | 0(2)   | -4(2)  |
| C(58) | 38(2) | 31(2)  | 42(3) | 0(2)  | 5(2)   | -2(2)  |
| C(59) | 37(2) | 58(3)  | 31(2) | -2(2) | 2(2)   | -9(2)  |
| C(60) | 42(3) | 77(4)  | 37(3) | 4(2)  | 2(2)   | 3(3)   |
| C(61) | 43(3) | 124(6) | 39(3) | 6(3)  | -4(2)  | 8(3)   |
| C(62) | 45(3) | 143(6) | 30(3) | -9(3) | -2(2)  | -15(4) |

|       |         |         |        |        |        |        |
|-------|---------|---------|--------|--------|--------|--------|
| C(63) | 50(3)   | 104(5)  | 42(3)  | -20(3) | 6(2)   | -8(3)  |
| C(64) | 43(3)   | 67(3)   | 35(2)  | -8(2)  | 0(2)   | -5(2)  |
| C(65) | 70(5)   | 249(12) | 62(4)  | -73(6) | 13(4)  | -47(6) |
| C(66) | 73(5)   | 302(17) | 45(5)  | -38(8) | -6(4)  | -10(9) |
| C(67) | 90(6)   | 370(20) | 36(4)  | 11(9)  | 5(4)   | 59(12) |
| C(68) | 102(7)  | 340(20) | 48(5)  | 16(9)  | 2(4)   | 74(12) |
| C(69) | 94(6)   | 225(12) | 64(5)  | 33(6)  | 18(4)  | 43(7)  |
| C(70) | 81(5)   | 219(12) | 40(4)  | 2(6)   | 2(3)   | 48(7)  |
| C(71) | 63(4)   | 180(9)  | 36(4)  | -11(5) | 5(3)   | 11(5)  |
| C(72) | 33(2)   | 44(3)   | 32(2)  | -2(2)  | 3(2)   | -3(2)  |
| C(73) | 44(3)   | 61(3)   | 37(3)  | 9(2)   | 3(2)   | 5(2)   |
| C(74) | 46(3)   | 76(4)   | 44(3)  | 3(3)   | 15(2)  | 13(3)  |
| C(75) | 47(3)   | 69(3)   | 34(2)  | 5(2)   | 13(2)  | 1(3)   |
| C(76) | 61(3)   | 65(3)   | 32(2)  | 8(2)   | 4(2)   | 3(3)   |
| C(77) | 50(3)   | 55(3)   | 35(2)  | 2(2)   | 4(2)   | 6(2)   |
| C(78) | 50(3)   | 143(7)  | 50(3)  | 9(4)   | 21(3)  | 15(4)  |
| C(79) | 89(5)   | 79(4)   | 41(3)  | 7(3)   | 19(3)  | 0(4)   |
| C(80) | 102(5)  | 74(4)   | 48(3)  | 1(3)   | 25(3)  | 1(4)   |
| C(81) | 105(6)  | 91(5)   | 49(4)  | -3(3)  | 0(4)   | 7(4)   |
| C(82) | 97(5)   | 142(7)  | 52(4)  | 4(4)   | -5(4)  | -3(5)  |
| C(83) | 71(4)   | 131(6)  | 47(3)  | 4(4)   | 7(3)   | 0(4)   |
| C(84) | 67(4)   | 85(4)   | 34(3)  | 5(3)   | 13(3)  | -1(3)  |
| C(85) | 208(11) | 77(5)   | 152(9) | 12(6)  | 113(8) | -19(6) |
| N(1)  | 35(2)   | 40(2)   | 53(2)  | 6(2)   | 7(2)   | -9(2)  |
| N(2)  | 51(3)   | 51(3)   | 105(4) | 7(3)   | 27(3)  | -17(2) |
| N(3)  | 32(2)   | 29(2)   | 29(2)  | -1(1)  | 3(1)   | -1(2)  |
| N(4)  | 39(2)   | 42(2)   | 31(2)  | 5(2)   | 1(2)   | 1(2)   |
| N(5)  | 34(2)   | 28(2)   | 33(2)  | 1(2)   | 7(2)   | -2(2)  |
| N(6)  | 29(2)   | 35(2)   | 40(2)  | 1(2)   | 3(2)   | -2(2)  |
| N(7)  | 41(2)   | 45(2)   | 38(2)  | -3(2)  | -1(2)  | -11(2) |
| N(8)  | 48(2)   | 49(2)   | 53(3)  | -1(2)  | -5(2)  | -16(2) |
| N(9)  | 53(3)   | 214(8)  | 33(3)  | -25(4) | -2(2)  | -9(4)  |
| N(10) | 76(4)   | 260(11) | 45(4)  | -49(6) | 0(3)   | -35(6) |
| N(11) | 64(3)   | 93(4)   | 35(2)  | 8(2)   | 13(2)  | 8(3)   |
| N(12) | 75(4)   | 141(6)  | 60(3)  | 19(3)  | 28(3)  | 16(4)  |

---



Table 3.5. Hydrogen coordinates ( $\times 10^4$ ) and isotropic displacement parameters ( $\text{\AA}^2 \times 10^3$ ) for Compound 5.

|        | x     | y     | z    | U(eq) |
|--------|-------|-------|------|-------|
| H(8A)  | 4149  | 9872  | 970  | 41    |
| H(9A)  | 2526  | 8884  | 934  | 43    |
| H(11A) | 3344  | 5866  | 1429 | 49    |
| H(12A) | 4972  | 6832  | 1460 | 46    |
| H(13A) | 1362  | 6773  | 1509 | 70    |
| H(15A) | -1144 | 5202  | 912  | 93    |
| H(16A) | -767  | 5217  | 519  | 100   |
| H(17A) | 817   | 5797  | 397  | 86    |
| H(18A) | 2111  | 6491  | 677  | 65    |
| H(21A) | 5947  | 10563 | 615  | 37    |
| H(22A) | 5295  | 9665  | 254  | 38    |
| H(24A) | 5188  | 5640  | 532  | 40    |
| H(25A) | 5772  | 6543  | 899  | 41    |
| H(26A) | 5684  | 8053  | -101 | 41    |
| H(28A) | 2866  | 5397  | -433 | 49    |
| H(29A) | 1787  | 4166  | -189 | 55    |
| H(30A) | 2071  | 4151  | 218  | 55    |
| H(31A) | 3429  | 5453  | 405  | 48    |
| H(34A) | 8236  | 8012  | 750  | 39    |
| H(35A) | 9340  | 8552  | 454  | 38    |
| H(37A) | 8861  | 12834 | 564  | 41    |
| H(38A) | 7775  | 12268 | 859  | 43    |
| H(39A) | 9166  | 12719 | 116  | 40    |
| H(41A) | 12421 | 11334 | -139 | 44    |
| H(42A) | 13328 | 9481  | 53   | 50    |
| H(43A) | 12742 | 8392  | 390  | 52    |
| H(44A) | 11161 | 8998  | 533  | 45    |
| H(47A) | 9473  | 8863  | 1167 | 47    |
| H(48A) | 11120 | 9757  | 1163 | 51    |
| H(50A) | 10193 | 13555 | 1428 | 44    |

|        |       |       |      |     |
|--------|-------|-------|------|-----|
| H(51A) | 8545  | 12674 | 1434 | 45  |
| H(52A) | 12217 | 12751 | 1631 | 58  |
| H(54A) | 14737 | 13538 | 1068 | 68  |
| H(55A) | 14386 | 13048 | 668  | 73  |
| H(56A) | 12821 | 12152 | 533  | 63  |
| H(57A) | 11529 | 11790 | 792  | 55  |
| H(60A) | 8792  | 8848  | 1721 | 62  |
| H(61A) | 9336  | 9122  | 2116 | 83  |
| H(63A) | 7337  | 12393 | 2182 | 78  |
| H(64A) | 6763  | 12089 | 1787 | 58  |
| H(65A) | 8700  | 13004 | 2483 | 152 |
| H(67A) | 9618  | 10093 | 3155 | 200 |
| H(68A) | 9573  | 7459  | 3118 | 194 |
| H(69A) | 9012  | 6333  | 2764 | 153 |
| H(70A) | 8576  | 7764  | 2421 | 136 |
| H(73A) | 4670  | 11074 | 1599 | 57  |
| H(74A) | 3990  | 11249 | 1972 | 66  |
| H(76A) | 5675  | 7823  | 2198 | 63  |
| H(77A) | 6399  | 7731  | 1828 | 56  |
| H(78A) | 2897  | 10043 | 2288 | 97  |
| H(80A) | 4039  | 9697  | 3098 | 89  |
| H(81A) | 5759  | 9457  | 3205 | 98  |
| H(82A) | 6955  | 9409  | 2920 | 117 |
| H(83A) | 6470  | 9460  | 2512 | 99  |
| H(85A) | 8540  | 5939  | 1356 | 170 |
| H(85B) | 7622  | 6983  | 1417 | 170 |

---

Unit cell packing diagram of **5** projected down the b axis:

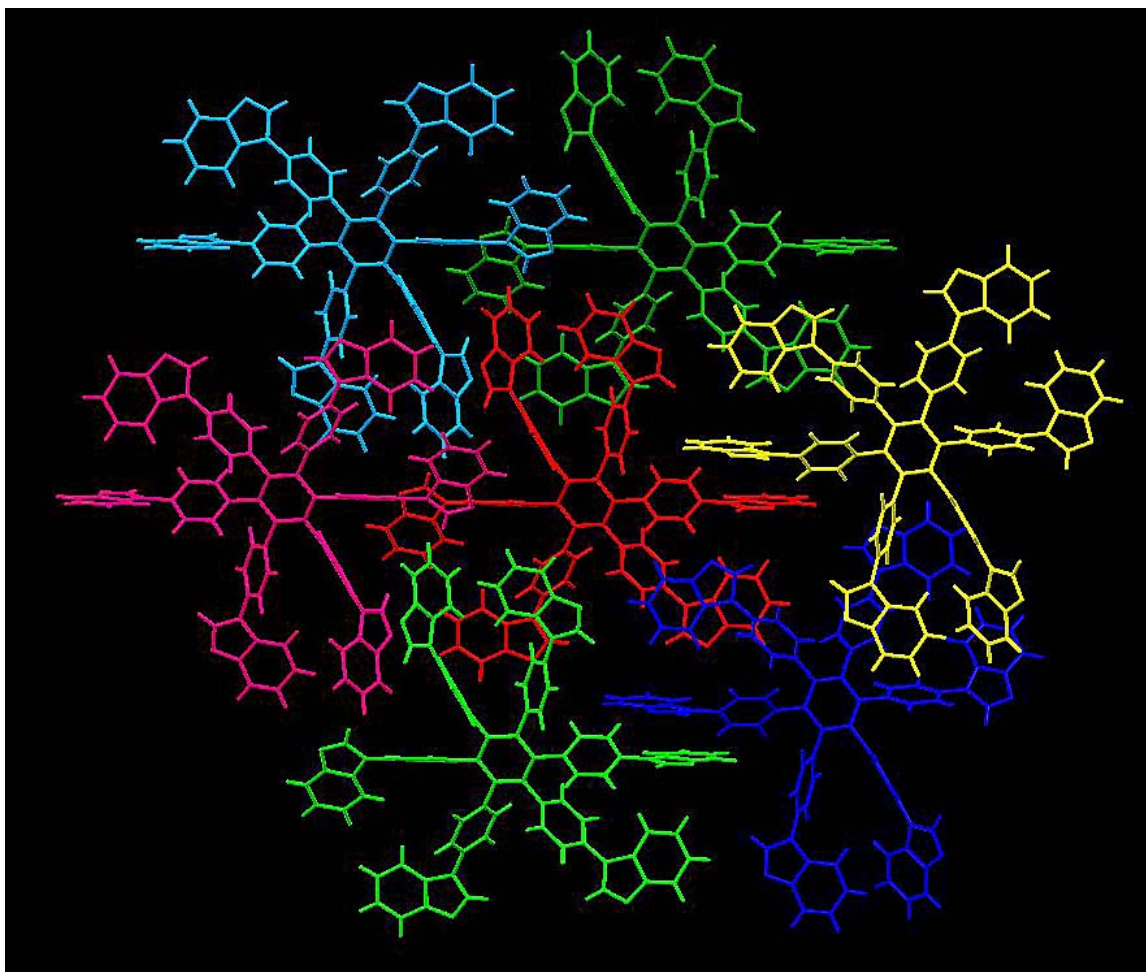

Supplement: b918203a.pdf [file b918203a.pdf]
